# Supplementary material
Source: PubMed Central journal article supplement (PMC3253215)
Supplement: NIHMS331288-supplement-Supp_Fig_S1-S3___Table_S1-S2.pdf [file NIHMS331288-supplement-Supp_Fig_S1-S3___Table_S1-S2.pdf]

## Supporting Figures and Tables

Figure S1.

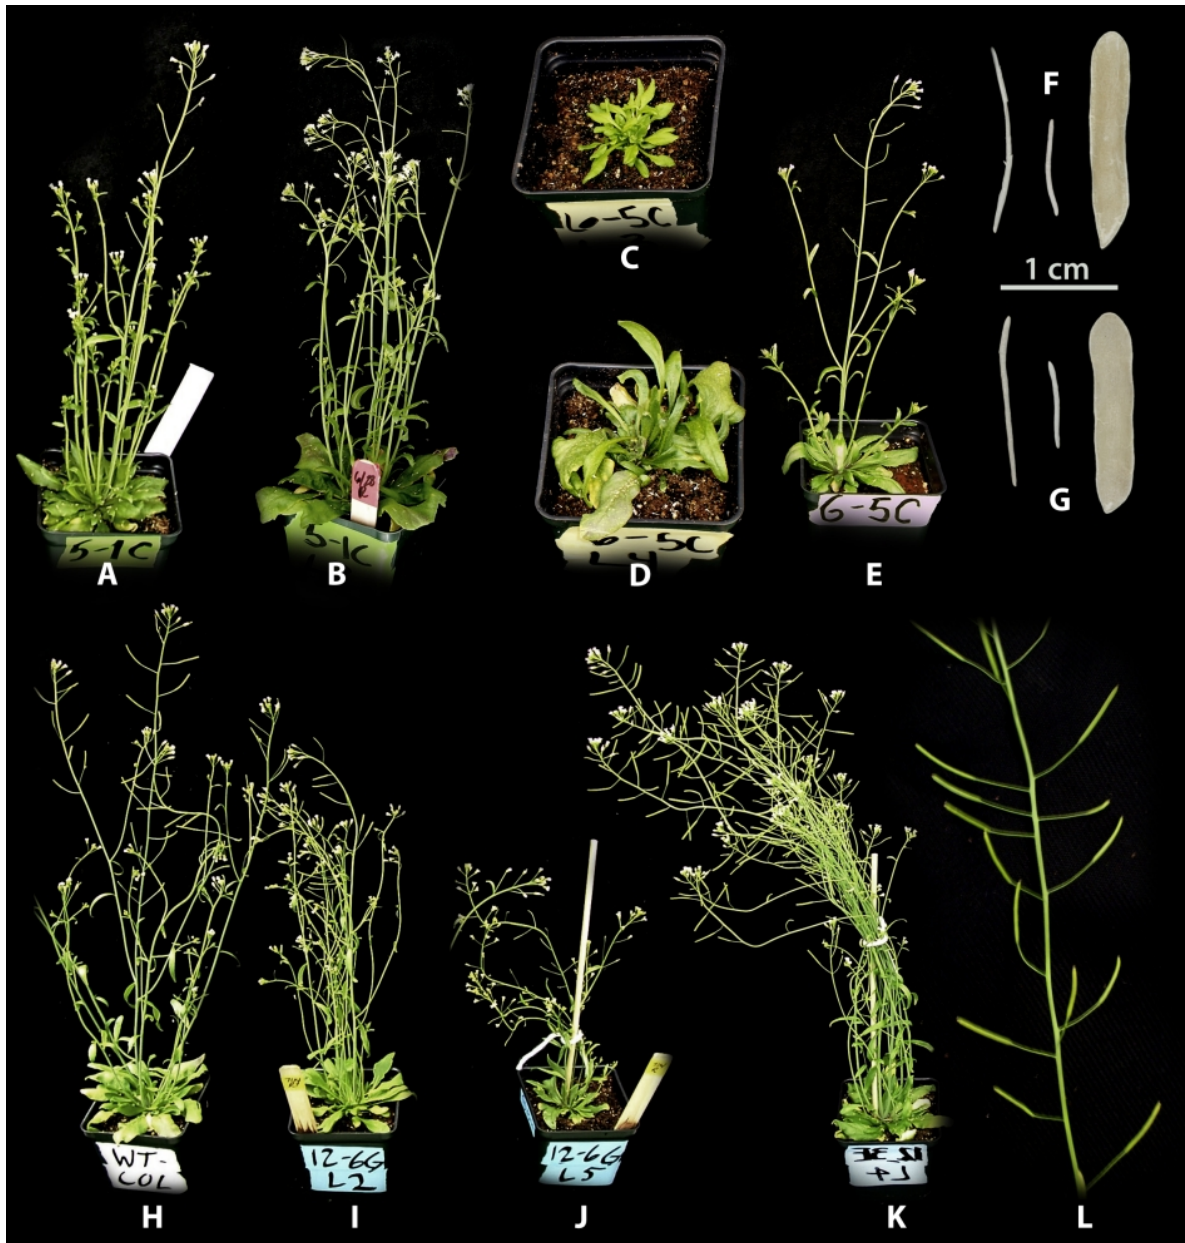

Additional examples of repeatable phenotypes from independent T1 plants transformed with clones 05\_01C, 06\_05C, 12\_06G and 12\_03E.

(A-B) Short fruit on T1 plants from clone 05\_01C plants. These T1 plants additionally shared stunted tertiary branches with slight loss of apical dominance (see wildtype plant in H for

comparison).

(C-E) T1 plants from clone 06\_05C showed abnormal vegetative development (C, D) and produced few seeds. T1 plant from clone 06\_05C with short fruit (E).

(F-G) Short valves from T1 plants 05\_01C (F, center) and 06\_05C (G, center). On the sides of each transformant valve is a wildtype valve from *A. thaliana* (left) and *L. alabamica* (right).

(H) *Arabidopsis thaliana* (Columbia).

(I-J) Two dwarf T1 plants from clone 12\_06G. The wildtype plant (H) was sowed at the same time as the dwarf plants.

(K-L) Clustered fruit of a T1 plant (K) and its kanamycin-resistant offspring (L) from clone 12\_03E.

**Figure S2.**

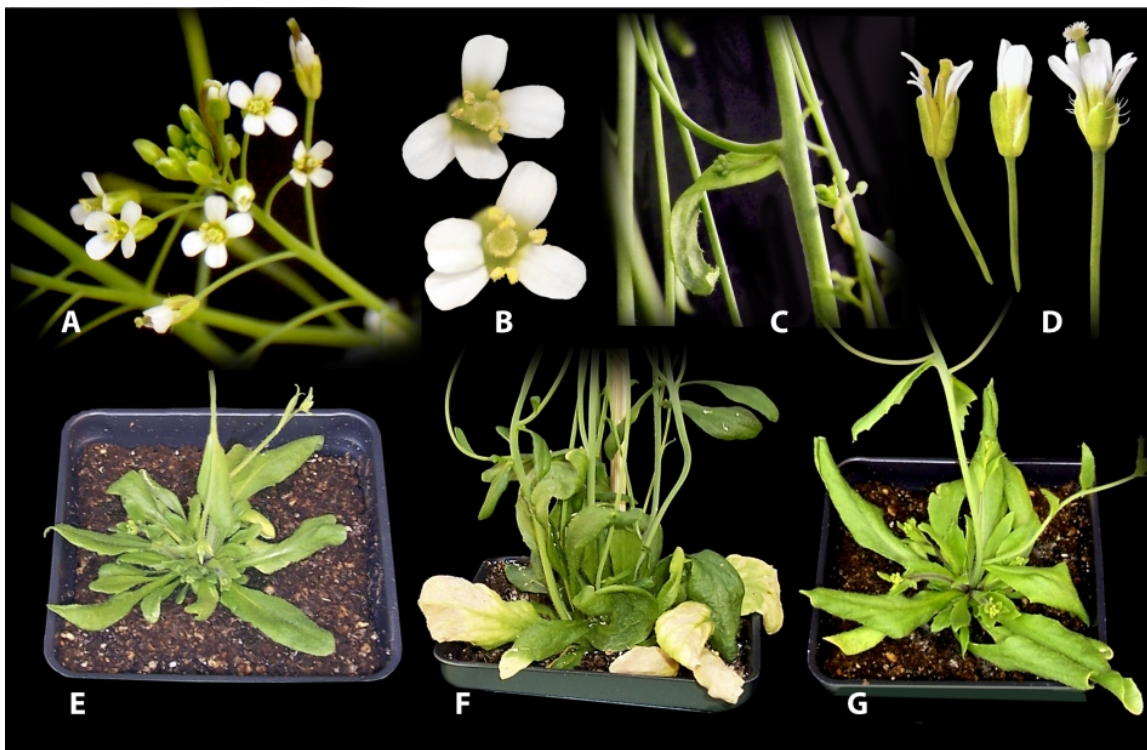

Additional examples of repeatable phenotypes from independent T1s transformed with clones 09\_09A, 12\_05A, and 11\_01D.

(A-B) Unevenly spaced petals on a T1 plant from clone 09\_09A (A), its kanamycin-resistant offspring (B, top), and a kanamycin-resistant T2 plant from a different T1 line (B, bottom).

(C) A decurrent cauline leaf in a T1 plant generated with clone 12\_05A.

(D) Splayed flower petals of two T1 plants from clone 11\_01D (E, sides), flanking a flower from wildtype *A. thaliana* (center). Photo taken in late afternoon when normal flowers are closed.

(E-G) Abnormal rosette leaf development of T1 plants from clone 11\_01D. Rosette leaf examples show some lobing (E), and severe (F) or moderate (G) contortion and twisting.

**Figure S3.**

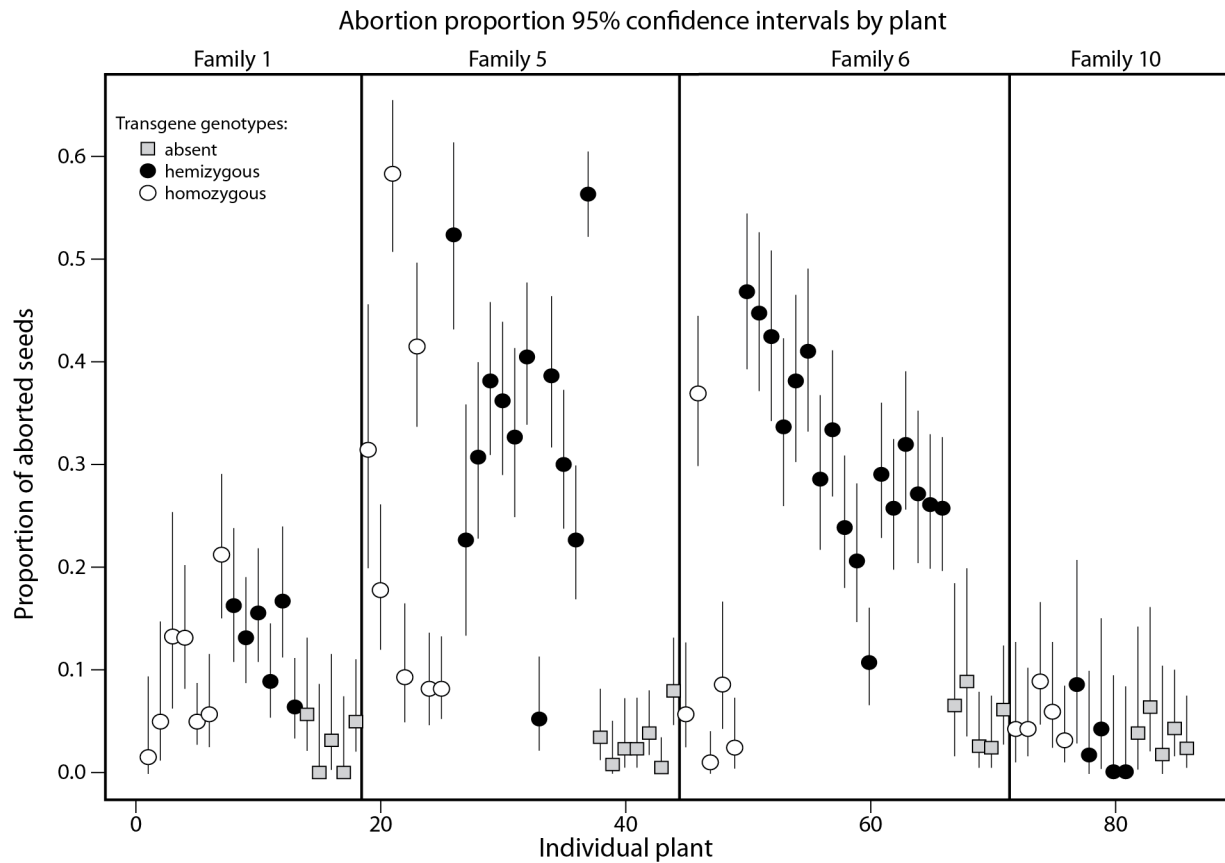

Seed abortion rates in four T2 families (lines 1, 5, 6, and 10) segregating for clone 11\_11B. For each family the seed abortion rates are plotted for the wildtype homozygotes (squares), transgene homozygotes (open circles), and hemizygotes (closed circles) with 95% confidence intervals.

Examination of the transgene-containing lines suggests a bimodal distribution, with a subset of lines having low levels of seed abortion (similar to wildtype lines) and a second subset having elevated abortion levels.

**Table S1. Observed kanamycin resistant:sensitive ratio (KRS) in screened T1 lines.**

| Clone  | Line | Observed T2 segregation |                  |                     | Interpretation <sup>a</sup> |
|--------|------|-------------------------|------------------|---------------------|-----------------------------|
|        |      | <i>resistant</i>        | <i>sensitive</i> | KRS(:1) [99% CI]    |                             |
| 05_01C | 1    | 271                     | 66               | 4.1 [2.88, 5.85]    | 1                           |
| 05_01C | 2    | 322                     | 170              | 1.9 [1.48, 2.42]    | <1                          |
| 05_01C | 4    | 466                     | 154              | 3.0 [2.38, 3.84]    | 1                           |
| 05_01C | 12   | 372                     | 163              | 2.3 [1.79, 2.91]    | <1                          |
| 05_01C | 13   | 307                     | 68               | 4.5 [3.20, 6.38]    | 1-2                         |
| 05_01C | 27   | 440                     | 93               | 4.7 [3.53, 6.35]    | 1-2                         |
| 06_05C | 1    | 454                     | 19               | 23.9 [13.07, 43.68] | 2                           |
| 06_05C | 3    | 343                     | 320              | 1.1 [0.88, 1.31]    | <1                          |
| 06_05C | 4    | 376                     | 19               | 19.8 [10.80, 36.27] | 2                           |
| 06_05C | 7    | 165                     | 110              | 1.5 [1.09, 2.06]    | <1                          |
| 09_09A | 1    | 198                     | 57               | 3.5 [2.36, 5.12]    | 1                           |
| 09_09A | 2    | 341                     | 88               | 3.9 [2.85, 5.27]    | 1                           |
| 09_09A | 4    | 350                     | 59               | 5.9 [4.13, 8.52]    | 1-2                         |
| 09_09A | 5    | 315                     | 103              | 3.1 [2.28, 4.10]    | 1                           |
| 11_01D | 1    | 260                     | 145              | 1.8 [1.37, 2.34]    | <1                          |
| 11_01D | 3    | 365                     | 100              | 3.7 [2.73, 4.88]    | 1                           |
| 11_01D | 4    | 231                     | 115              | 2.0 [1.50, 2.70]    | <1                          |
| 11_01D | 5    | 309                     | 190              | 1.6 [1.28, 2.06]    | <1                          |
| 11_01D | 6    | 360                     | 97               | 3.7 [2.76, 4.98]    | 1                           |
| 11_01D | 7    | 465                     | 180              | 2.6 [2.06, 3.24]    | 1                           |
| 11_01D | 25   | 434                     | 133              | 3.3 [2.53, 4.21]    | 1                           |
| 11_01D | 30   | 430                     | 72               | 6.0 [4.30, 8.29]    | 1-2                         |
| 11_11B | 1    | 433                     | 109              | 4.0 [3.01, 5.24]    | 1-2                         |
| 11_11B | 2    | 54                      | 401              | 0.1 [0.09, 0.20]    | <1                          |

|        |    |      |     |                   |     |
|--------|----|------|-----|-------------------|-----|
| 11_11B | 5  | 462  | 109 | 4.2 [3.22, 5.58]  | 1-2 |
| 11_11B | 6  | 37   | 9   | 4.1 [1.58, 10.71] | 1   |
| 11_11B | 10 | 481  | 79  | 6.1 [4.45, 8.32]  | 1-2 |
| 11_11B | 15 | 88   | 262 | 0.3 [0.24, 0.46]  | <1  |
| 12_03E | 1  | 69   | 665 | 0.1 [0.07, 0.14]  | <1  |
| 12_03E | 4  | 435  | 171 | 2.5 [2.02, 3.21]  | 1   |
| 12_03E | 5  | 404  | 153 | 2.6 [2.07, 3.37]  | 1   |
| 12_03E | 13 | 293  | 57  | 5.1 [3.54, 7.46]  | 1-2 |
| 12_03E | 14 | 502  | 161 | 3.1 [2.47, 3.94]  | 1   |
| 12_05A | 4  | 354  | 92  | 3.8 [2.85, 5.20]  | 1   |
| 12_05A | 5  | 304  | 84  | 3.6 [2.63, 4.97]  | 1   |
| 12_05A | 6  | 1497 | 491 | 3.0 [2.67, 3.49]  | 1   |
| 12_05A | 7  | 440  | 184 | 2.4 [1.91, 3.00]  | 1   |
| 12_06G | 1  | 32   | 114 | 0.3 [0.17, 0.47]  | <1  |
| 12_06G | 2  | 112  | 75  | 1.5 [1.02, 2.19]  | <1  |
| 12_06G | 8  | 379  | 122 | 3.1 [2.38, 4.06]  | 1   |
| 12_06G | 38 | 413  | 134 | 3.1 [2.39, 3.98]  | 1   |
| 12_06G | 39 | 356  | 116 | 3.1 [2.33, 4.04]  | 1   |
| 12_06G | 41 | 523  | 103 | 5.1 [3.85, 6.70]  | 1-2 |
| 12_06G | 42 | 413  | 138 | 3.0 [2.32, 3.86]  | 1   |

---

<sup>a</sup> If the 99% confidence interval of the observed KRS odds estimate contains the null expectation for a single locus (1) or two, unlinked loci (2) this is indicated. If the 99% confidence interval is below the null expectation for a single locus (<1), silencing of the selectable marker is likely. If the 99% confidence interval is between the null expectations for one and two loci (1-2), then this could indicate two linked loci or two (or more) loci with some silencing.

**Table S2. Tests for gene silencing among lines with KRS ratios significantly less than 3.**

| Clone  | Line | Observed T2 segregation |                             | Interpretation |
|--------|------|-------------------------|-----------------------------|----------------|
|        |      | KRS(:1) [99% CI]        | <i>NPTII</i> (:1) [99% CI]* |                |
| 05_01C | 2    | 1.9 [1.48, 2.42]        | 6.3 [1.56, 25.02]           | a              |
| 05_01C | 12   | 2.3 [1.79, 2.91]        | 2.6 [0.93, 7.04]            | a              |
| 06_05C | 3    | 1.1 [0.88, 1.31]        | 2.2 [0.82, 5.88]            | a              |
| 06_05C | 7    | 1.5 [1.09, 2.06]        | 1.3 [0.50, 3.57]            | a              |
| 11_01D | 1    | 1.8 [1.37, 2.34]        | 1.6 [0.52, 4.68]            | a              |
| 11_01D | 4    | 2.0 [1.50, 2.70]        | 1.5 [0.58, 3.69]            | a              |
| 11_01D | 5    | 1.6 [1.28, 2.06]        | 3.0 [1.05, 8.59]            | a              |
| 11_11B | 2    | 0.1 [0.09, 0.20]        | 1.4 [0.54, 3.74]            | b              |
| 11_11B | 15   | 0.3 [0.24, 0.46]        | 2.3 [0.84, 6.51]            | b              |
| 12_03E | 1    | 0.1 [0.07, 0.14]        | 0.3 [0.12, 0.95]            | c              |
| 12_06G | 1    | 0.3 [0.17, 0.47]        | 1.0 [0.44, 2.26]            | c              |
| 12_06G | 2    | 1.5 [1.02, 2.19]        | 4.7 [1.66, 13.77]           | b              |

\* Between 23-40 T2 offspring were genotyped for presence/absence of *NPTII*.

<sup>a</sup> Unclear whether the deficient KRS ratio reflects a deficit of the *NPTII* genotype in the T2 generation. 99% confidence interval of the *NPTII* ratio includes the deficient KRS ratio and at least one Mendelian segregation ratio (3 and/or 15).

<sup>b</sup> Gene silencing accounts for the deficient KRS ratio. 99% confidence interval of the *NPTII* ratio lacks the KRS ratio and contains the Mendelian ratio (3) expected for a single transgene locus.

<sup>c</sup> Lines show a significant deficit of the *NPTII* genotype in the T2 generation. A more complex genetic mechanism (e.g. Ray *et al.*, 1997) may account for this effect. The 99% confidence interval of the *NPTII* ratio is beneath the lowest Mendelian ratio 3.
